# Supplementary material for: Immunogenicity and Immune Silence in Human Cancer
Source: Front Immunol. 2020 Mar 6;11:69. doi: 10.3389/fimmu.2020.00069 (PMC7092187; doi:10.3389/fimmu.2020.00069)
Supplement: Table S3 — Validation of HLA genotyping. Comparison of HLA predictions across 15 HLA alleles as inferred from PHLAT algorithm from exome sequencing data of three neuroblastoma cell lines compared to clinical genotyping performed using next generation sequencing of amplified HLA loci. [file Table_3.XLSX]

## Sheet: Sheet1
	PHLAT prediction						Clinical genotyping
SKNAS
Locus	Allele 1	Allele 2	pval1	pval2			Allele 1	Allele 2
HLA_A	A*24:02	A*26:01	0.082	0.013			A*24:02	A*26:01
HLA_B	B*14:01:01	B*40:01:02	0.012	0.019			B*14:01:01	B*40:01:02
HLA_C	C*03:04:01	C*08:02:01	0.0006	0.01			C*03:04:01	C*08:02:01
NEBC1
Locus	Allele1	Allele2	pval1	pval2			Allele1	Allele2
HLA_A	A*02:01:01	A*02:01:18	0.031	0.031			A*02:01:01	A*02:01:18
HLA_B	B*15:01:01	B*57:01:01	0.0018	0.0098			B*15:01:01	B*57:01:01
HLA_C	C*03:03:01	C*06:02:01	0.036	0.025			C*03:03:01	C*06:02:01
NB1691
Locus	Allele1	Allele2	pval1	pval2			Allele1	Allele2
HLA_A	A*11:01:01	A*30:02:01	0.041	0.04			A*11:01:01	A*30:02:01
HLA_B	B*18:01:01	B*50:01:01	0.025	0.004			B*18:01:01	B*50:01:01
HLA_C	C*05:01:01	C*07:02:01	0.022	0.15			C*05:01:01	C*07:02:01
