# Supplementary material for: Immunogenicity and Immune Silence in Human Cancer
Source: Front Immunol. 2020 Mar 6;11:69. doi: 10.3389/fimmu.2020.00069 (PMC7092187; doi:10.3389/fimmu.2020.00069)
Supplement: Table S5 — Immunoedited variants from TCGA. List of variants most underrepresented when measured with population of patients harboring HLA alleles predicted to bind neoantigens derived from variant (p ≤ 0.05). Frequency of mutation is number of occurrences of mutation in Table S4. Percent of population with binders is the probability of a TCGA subject harboring an HLA allele capable of binding a neoepitope derived from the particular variant. Observed mutation is frequency calculated from the number of patients with at least one HLA allele from the set of those capable of binding the variant. [file Table_5.XLSX]

## Sheet: mutations
Hugo_Symbol	HGVSp_Short	variant	mut freq	% of population binders	HLAs bound	expected mut freq with HLA binder	observed mut freq with HLA binder	p-val
PTEN	p.D92E	PTEN_D92E	5	0.607	12	3.03323	0	0.00941716
KRAS	p.G12A	KRAS_G12A	35	0.122	4	4.28156	0	0.0103894
SMAD4	p.R361H	SMAD4_R361H	17	0.196	2	3.33715	0	0.0243541
TP53	p.A159V	TP53_A159V	14	0.429	8	5.99951	2	0.0248261
KRAS	p.A146T	KRAS_A146T	21	0.149	6	3.12555	0	0.0339065
EGFR	p.L858R	EGFR_L858R	23	0.5	9	11.501	7	0.0465296
IDH1	p.R132H	IDH1_R132H	361	0.102	8	36.8012	27	0.0483086
AKT1	p.E17K	AKT1_E17K	42	0.37	9	15.5781	10	0.049206
